# Supplementary material
Source: publisher figshare collection journal article supplement (https://gsapubs.figshare.com/ndownloader/files/38883165)
Supplement: Supplementary file 1 [file 38883165]

## Sheet: Sheet1
	Rock-Eval not-acidified cuttings		Rock-Eval acidified cuttings		Correction for EOM contribution			Corrected
Sample name	TOC [%]	S1 [mg HC/g]	TOC [%]	S1 [mg HC/g]	EOC	f-EOC	f-SOC*	d13C-SOC*
25390	2.37	14.64	3.14	18.26	1.86	0.59	0.41	-27.59
25420	2.6	14.04	3.55	16.05	1.58	0.44	0.56	-30.08
25450	2.36	13.16	3.24	16.68	1.63	0.5	0.5	-29.05
25480	2.51	17.46	3.98	24.05	2.24	0.56	0.44	-27.98
25510	2.02	13.21	3.01	16.17	1.59	0.53	0.47	-28.53
25520	2.69	17.45	4.04	22.97	2.15	0.53	0.47	-28.31
25540	2.42	13.99	2.74	14.62	1.46	0.53	0.47	-28.39
25570	1.94	12.79	2.3	13.07	1.33	0.58	0.42	-28.48
25600	2.66	19.7	2.9	18.38	1.77	0.61	0.39	-28.51
25610	2.69	17.75	2.97	17.84	1.72	0.58	0.42	-29.54
25620	3.15	21.38	3.36	18.62	1.79	0.53	0.47	-29.44
25630	3.66	25.68	3	14.01	1.41	0.47	0.53	-29.85
25640	1.99	10.33	1.87	8.9	0.99	0.53	0.47	-30.17
25650	2.95	20.26	2.55	15.1	1.5	0.59	0.41	-29.36
25660	2.02	12.14	1.87	10.34	1.1	0.59	0.41	-29.93
25670	1.89	11.74	1.81	9.7	1.05	0.58	0.42	-29.55
25680	2.12	13.13	2.82	14.73	1.47	0.52	0.48	-28.91
25690	2.59	14.52	2.53	13.98	1.41	0.56	0.44	-29.63
25700	3.34	23.74	2.95	17.77	1.72	0.58	0.42	-28.51
25710	3.28	22.91	3.14	19.52	1.86	0.59	0.41	-28.01
25730	4.74	31.44	4.1	20.26	1.92	0.47	0.53	-29.1
25740	3.98	27.55	3.57	20.19	1.92	0.54	0.46	-28.3
25750	3.79	26.57	3.23	17.68	1.71	0.53	0.47	-28.35
25760	4.16	31.28	3.58	19.92	1.9	0.53	0.47	-27.96
25760	4.26	31.35	3.51	17.71	1.71	0.49	0.51	-27.91
25780	4.23	30.57	3.58	18.18	1.75	0.49	0.51	-27.52
25790	3.61	24.11	3.36	20.45	1.94	0.58	0.42	-28.74
25800	3.63	26.22	3.43	21.05	1.99	0.58	0.42	-28.31
25810	4.19	31.19	3.55	20.75	1.96	0.55	0.45	-27.66
25820	4.05	31.01	3.37	18.11	1.75	0.52	0.48	-27.83
25830	4.07	31.57	3.32	18.78	1.8	0.54	0.46	-27.87
25840	3.96	30.72	3.36	18.48	1.78	0.53	0.47	-27.89
25850	3.92	30.09	3.06	15.26	1.51	0.49	0.51	-28.12
25860	4.19	32.97	3.43	18.78	1.8	0.52	0.48	-28.05
25870	3.94	28.95	3.22	15.69	1.55	0.48	0.52	-27.77
25880	4.27	31.51	3.41	17.93	1.73	0.51	0.49	-28.03
25890	4.29	30.97	3.87	21.75	2.05	0.53	0.47	-28.05
25900	3.56	27.11	3.25	17.97	1.74	0.53	0.47	-27.85
25910	3.56	26.12	3.32	21.36	2.02	0.61	0.39	-27.85
25920	3.77	28.5	3.14	16.9	1.65	0.52	0.48	-28.27
25930	4.07	31.77	2.67	10.56	1.12	0.42	0.58	-27.55
25940	3.47	27.85	2.27	10.66	1.13	0.5	0.5	-27.61
25950	4.05	32.98	2.7	13.32	1.35	0.5	0.5	-27.95
25960	4.52	34.97	3.58	18.39	1.77	0.49	0.51	-27.54
25970	4.2	30.68	2.88	11.03	1.16	0.4	0.6	-27.69
25980	3.9	28.52	2.45	7.43	0.86	0.35	0.65	-28.39
25990	4.11	30.82	2.86	11.72	1.22	0.43	0.57	-27.73
26000	3.86	28.17	2.96	12.71	1.3	0.44	0.56	-27.64
26010	4.17	31.98	3.25	16.1	1.58	0.49	0.51	-28.27
26020	4.03	28.63	2.93	11.39	1.19	0.41	0.59	-27.7
26030	4.21	30.12	3.02	11.08	1.17	0.39	0.61	-27.7
26040	4.21	29.2	2.96	9.97	1.07	0.36	0.64	-27.69
26050	3.98	28.25	2.88	11.66	1.21	0.42	0.58	-27.59
26060	4.16	27.41	3.37	13.44	1.36	0.4	0.6	-27.67
26070	4.08	27.46	2.91	10.18	1.09	0.38	0.62	-27.76
26080	3.92	27.73	2.87	11.46	1.2	0.42	0.58	-27.94
26090	3.74	26.02	2.96	11.9	1.23	0.42	0.58	-27.94
26100	3.76	26.07	2.85	10.06	1.08	0.38	0.62	-27.95
26110	3.93	27.29	2.96	10.71	1.13	0.38	0.62	-27.67
26120	4.21	28.63	3.06	10.83	1.14	0.37	0.63	-27.44
26130	3.99	27.88	2.79	10.92	1.15	0.41	0.59	-27.95
26140	3.54	25.47	3.14	16.06	1.58	0.5	0.5	-28
26150	3.62	25.71	3.26	16.68	1.63	0.5	0.5	-27.94
26160	3.87	27.37	2.97	11.48	1.2	0.4	0.6	-28.15
26170	3.84	26.28	2.87	10.03	1.08	0.38	0.62	-27.91
26180	3.83	25.65	3.01	12.54	1.29	0.43	0.57	-27.94
26190	3.9	26.86	3.09	13.95	1.4	0.45	0.55	-27.75
26200	4.05	28.53	2.71	10.12	1.09	0.4	0.6	-27.87
26210	3.93	25.57	2.96	11.09	1.17	0.39	0.61	-27.95
26220	3.79	24.86	2.84	10.68	1.13	0.4	0.6	-27.75
26230	3.68	23.6	2.97	11.89	1.23	0.41	0.59	-27.8
26240	3.28	20.88	3.29	14.75	1.47	0.45	0.55	-28.62
26250	3.31	20.52	3.12	13.64	1.38	0.44	0.56	-28.45
26260	3.37	21.11	3.09	14.09	1.41	0.46	0.54	-28.38
26270	3.44	20.29	2.97	13.13	1.33	0.45	0.55	-28.86
26280	3.3	21.68	3.28	16.42	1.61	0.49	0.51	-27.9
26290	3.25	20	3.03	14.11	1.42	0.47	0.53	-28.47
26310	3.12	20.23	2.73	12.83	1.31	0.48	0.52	-28.45
26320	2.73	20.01	2.07	9.91	1.07	0.52	0.48	-28.68
26330	3.19	24.09	2.6	13.86	1.4	0.54	0.46	-28.91
26340	2.77	21.43	2.08	11.56	1.21	0.58	0.42	-28.45
26350	3.67	27.89	2.89	15.55	1.53	0.53	0.47	-28.81
26360	3.78	27.36	3.28	17.48	1.69	0.52	0.48	-28.65
26370	3.77	28.46	3.2	18.24	1.76	0.55	0.45	-29.16
26380	3.21	23.59	2.87	16.57	1.62	0.56	0.44	-28.58
26390	2.99	21.38	2.85	14.46	1.44	0.51	0.49	-29.1
26400	3.03	23.18	2.66	15.11	1.5	0.56	0.44	-28.65
26410	3.13	24.88	2.59	15.76	1.55	0.6	0.4	-28.99
26420	3.01	22.94	2.95	19.14	1.83	0.62	0.38	-28.29
26430	3.35	23.14	3.37	19.15	1.83	0.54	0.46	-28.7
26440	3.27	21.56	3.29	16.87	1.64	0.5	0.5	-28.62
26450	3.21	20.77	3.31	17.24	1.67	0.51	0.49	-28.68
26460	3.24	22.51	3.54	16.81	1.64	0.46	0.54	-28.99
26470	3.23	21.29	3.02	14.27	1.43	0.47	0.53	-28.73
26480	3.25	21.43	3.27	14.73	1.47	0.45	0.55	-28.91
26490	2.95	18.41	3.29	14.71	1.47	0.45	0.55	-28.64
26500	3.08	17.88	3.3	14.92	1.48	0.45	0.55	-28.1
26510	3.65	23.43	3.82	18.74	1.8	0.47	0.53	-28.37
26520	3.36	23.8	3.31	16.65	1.63	0.49	0.51	-28.6
26530	3.02	22.08	3.07	16.24	1.59	0.52	0.48	-28.72
26540	2.8	21.25	2.63	14.28	1.43	0.54	0.46	-28.79
26550	3.44	23.57	2.92	15.62	1.54	0.53	0.47	-28.42
26560	2.92	23.24	2.68	15.57	1.54	0.57	0.43	-28.66
26570	3.16	23.18	3.32	18.65	1.79	0.54	0.46	-28.35
26580	3.64	24.98	3.67	17.99	1.74	0.47	0.53	-28.59
26590	3.63	26.02	3.72	20.55	1.95	0.52	0.48	-28.43
26600	3.55	25.54	3.81	20.42	1.94	0.51	0.49	-28.59
26610	3.23	29.27	4.14	21.59	2.03	0.49	0.51	-28.53
26620	4.15	25.93	4.33	21.05	1.99	0.46	0.54	-29.15
26630	4.32	29.22	3.83	18.22	1.76	0.46	0.54	-28.74
26640	3.84	27.55	3.6	16.64	1.63	0.45	0.55	-28.76
26650	3.27	22.33	3.59	16.65	1.63	0.45	0.55	-29.02
26660	3.38	24.98	3.05	18.09	1.75	0.57	0.43	-29.38
26670	3.05	21.82	3.07	18.92	1.81	0.59	0.41	-28.76
26680	3.41	25.93	2.7	16.11	1.58	0.59	0.41	-28.91
26690	2.8	18.73	2.64	16.02	1.57	0.6	0.4	-28.92
26700	2.65	17.97	2.36	13.34	1.35	0.57	0.43	-28.63
26710	2.42	16.57	2.43	14.45	1.44	0.59	0.41	-29.02
26720	2.26	15.18	2.28	13.18	1.34	0.59	0.41	-29.23
26730	1.84	11.46	1.92	10.37	1.11	0.58	0.42	-29.45
26740	2.55	18.18	2.48	14.48	1.45	0.58	0.42	-29.17
26750	2.39	17.58	2.23	12.54	1.29	0.58	0.42	-29.48
26760	2.48	17.23	2.4	14.08	1.41	0.59	0.41	-29.09
26770	2.79	20.03	2.68	14.97	1.49	0.55	0.45	-29.12
26780	2.63	17.37	2.55	13.05	1.33	0.52	0.48	-29.4
26790	2.96	18.51	2.8	14.06	1.41	0.5	0.5	-29.23
26800	3.43	23.2	3.5	19.18	1.84	0.52	0.48	-28.33
26810	3.44	25.29	3.23	18.03	1.74	0.54	0.46	-29.13
26820	2.97	21.85	2.8	15.85	1.56	0.56	0.44	-29.12
26830	3.53	25.66	3.31	19.31	1.85	0.56	0.44	-28.76
26840	4.2	26.29	3.86	18.69	1.8	0.46	0.54	-28.83
26850	3.73	22.7	3.83	19.13	1.83	0.48	0.52	-28.91
26860	3.26	23.32	3.43	21.11	2	0.58	0.42	-28.44
26870	3.23	21.12	3.12	16.56	1.62	0.52	0.48	-28.09
26880	3.08	22.28	2.66	13.08	1.33	0.5	0.5	-28.78
26890	3.35	22.43	2.96	14.84	1.48	0.5	0.5	-28.04
26900	3.79	24.8	2.8	10.54	1.12	0.4	0.6	-27.71
26910	3.65	23.72	3.14	15.13	1.5	0.48	0.52	-27.77
26920	4.07	26.18	3.31	14.07	1.41	0.43	0.57	-27.78
26930	4.07	25.88	3.42	15.92	1.57	0.46	0.54	-27.57
26940	3.62	22.29	3.23	13.86	1.4	0.43	0.57	-27.76
26950	3.83	25.28	3.63	20.15	1.92	0.53	0.47	-28.12
26960	4.35	29.19	3.9	19.62	1.87	0.48	0.52	-28.06
26970	4.14	27.31	3.38	13.93	1.4	0.42	0.58	-27.81
26980	3.91	25.6	3.25	12.96	1.32	0.41	0.59	-27.72
26990	4.07	26.62	3.7	17.3	1.68	0.45	0.55	-27.87
27000	4.24	29.32	3.21	11.95	1.24	0.39	0.61	-28.1
27010	4.16	25.8	3.9	18.56	1.78	0.46	0.54	-27.73
27020	4.43	29.4	4.06	20.24	1.92	0.47	0.53	-27.85
27030	4.5	30.12	3.97	17.64	1.71	0.43	0.57	-28.13
27040	4.66	32	4.15	20.54	1.95	0.47	0.53	-27.64
27050	4.86	33.4	4.48	23.09	2.16	0.48	0.52	-27.87
27060	4.68	31.01	4.23	20.25	1.92	0.45	0.55	-27.87
27070	4.08	26.25	3.7	16.61	1.62	0.44	0.56	-27.71
27080	4.43	33	3.82	22.21	2.09	0.55	0.45	-27.4
27090	5.07	39.07	3.96	21.04	1.99	0.5	0.5	-27.68
27100	5.14	37.1	4.33	21.53	2.03	0.47	0.53	-27.97
27110	5.12	36.39	3.47	10.95	1.15	0.33	0.67	-28.39
27120	4.77	37.24	3.74	19.06	1.83	0.49	0.51	-27.96
27130	4.65	33.51	3.81	17.45	1.69	0.44	0.56	-27.8
27140	4.94	33.53	4.07	16.45	1.61	0.4	0.6	-27.54
27150	4.88	30.77	4.35	17.31	1.68	0.39	0.61	-27.42
27160	4.79	31.23	4.25	17.83	1.72	0.41	0.59	-27.31
27170	4.85	31.29	4.21	17.26	1.68	0.4	0.6	-27.2
27180	4.69	30.99	4.01	15.71	1.55	0.39	0.61	-27.58
27190	4.29	30.68	3.64	17.75	1.72	0.47	0.53	-27.66
27200	4.34	27.46	3.64	17.14	1.67	0.46	0.54	-28.65
27210	4.31	28.15	3.93	16.59	1.62	0.41	0.59	-27.51
27220	3.94	30.26	3.38	18.06	1.74	0.52	0.48	-27.44
27230	4.72	38.9	3.56	20.88	1.98	0.56	0.44	-27.32
27240	3.6	23.13	3.28	14.33	1.43	0.44	0.56	-27.3
27250	3.72	24.24	3.19	14.07	1.41	0.44	0.56	-26.98
27260	4.07	29.39	3.3	16.63	1.62	0.49	0.51	-27.45
27270	4.05	27.58	2.96	13.5	1.37	0.46	0.54	-27.46
27280	3.71	26.19	3.03	13.42	1.36	0.45	0.55	-27.42

## Sheet: G50641
Vimpere, L., et al., 2023, Carbon isotope and biostratigraphic evidence for an expanded Paleocene–Eocene Thermal Maximum sedimentary record in the deep Gulf of Mexico: Geology, https://doi.org/10.1130/G50641.1
